# Supplementary material for: Epigenetic master regulators HDAC1 and HDAC5 control pathobiont Enterobacteria colonization in ileal mucosa of Crohn’s disease patients
Source: PubMed Central journal article supplement (PMC9542275; doi:10.1080/19490976.2022.2127444), 2022-09-29
Supplement: KGMI_A_2127444_SM5432.pdf [file KGMI_A_2127444_SM5432.pdf]

**Supplementary Table S1: Characteristics of the REMIND cohort used in this study.**

| n = 171 patients                                    | CD patients non-colonized by Enterobacteria (n=95) | CD patients colonized by MAEC Enterobacteria (n=51) | CD patients colonized by AIEC Enterobacteria (n=25) |
|-----------------------------------------------------|----------------------------------------------------|-----------------------------------------------------|-----------------------------------------------------|
| Age at the time of surgery (mean ± SD)              | 32.8 ± 11.8                                        | 36.6 ± 12.5                                         | 37.6 ± 14.5 years                                   |
| Disease duration (median, IQR)                      | 4 [1.0-10.0] years                                 | 8 [2.5-15.0] years                                  | 5 [2.3-8.0] years                                   |
| Female gender n (%)                                 | 51 (53.7%)                                         | 22 (43.1%)                                          | 13 (52.0%)                                          |
| <b>Montreal classification</b>                      |                                                    |                                                     |                                                     |
| <i>Location</i>                                     |                                                    |                                                     |                                                     |
| L1 n (%)                                            | 55 (57.9%)                                         | 35 (68.6%)                                          | 15 (60.0%)                                          |
| L2 n (%)                                            | 0 (0%)                                             | 1 (2.0%)                                            | 0 (0%)                                              |
| L3 n (%)                                            | 38 (40.0%)                                         | 15 (29.4%)                                          | 10 (40.0%)                                          |
| L4 n (%)                                            | 2 (2.1%)                                           | 0 (0%)                                              | 0 (0%)                                              |
| Perianal lesions n (%)                              | 20 (21.1%)                                         | 12 (23.5%)                                          | 4 (16.0%)                                           |
| <i>Behaviour</i>                                    |                                                    |                                                     |                                                     |
| B1 n (%)                                            | 21 (22.1%)                                         | 5 (9.8%)                                            | 4 (16.0%)                                           |
| B2 n (%)                                            | 38 (40.0%)                                         | 27 (52.9%)                                          | 17 (68.0%)                                          |
| B3 n (%)                                            | 36 (37.9%)                                         | 19 (37.3%)                                          | 4 (16.0%)                                           |
| Prior intestinal resection n (%)                    | 16 (16.8%)                                         | 11 (21.6%)                                          | 7 (28.0%)                                           |
| <b>Medications before surgery</b>                   |                                                    |                                                     |                                                     |
| No treatment n (%)                                  | 14 (14.7%)                                         | 8 (15.7%)                                           | 6 (24.0%)                                           |
| Antibiotics use within 4 weeks before surgery n (%) | 38 (40.0%)                                         | 12 (23.5%)                                          | 7 (28.0%)                                           |
| Corticothérapie n (%)                               | 29 (30.5%)                                         | 20 (39.2%)                                          | 6 (24.0%)                                           |
| Azathioprine n (%)                                  | 19 (20.0%)                                         | 24 (47.1%)                                          | 3 (12.0%)                                           |
| Methotrexate n (%)                                  | 2 (2.1%)                                           | 2 (3.9%)                                            | 1 (4.0%)                                            |
| Anti-TNF agents n (%)                               | 46 (48.4%)                                         | 27 (52.9%)                                          | 15 (60.0%)                                          |

SD: standard deviation, IQR: interquartile range, n: number, TNF: Tumor Necrosis Factor

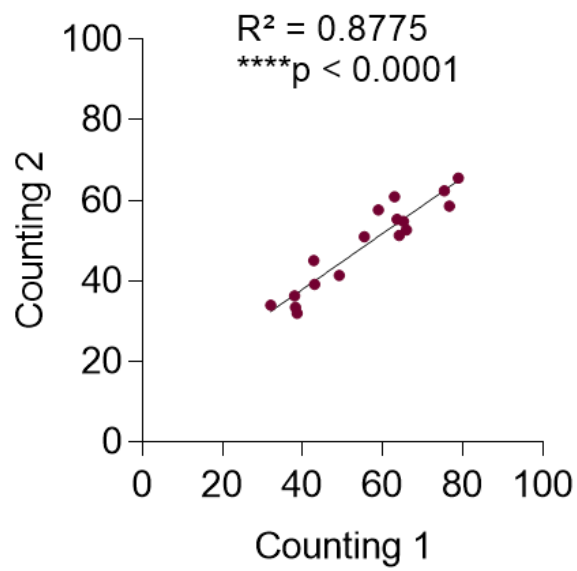

**Figure S1: Validation of the counting method.** Correlation between the results of the two countings of H3ac positive cells made by 2 different persons (n=17). Correlation existing between two variables were assessed by a Spearman test.

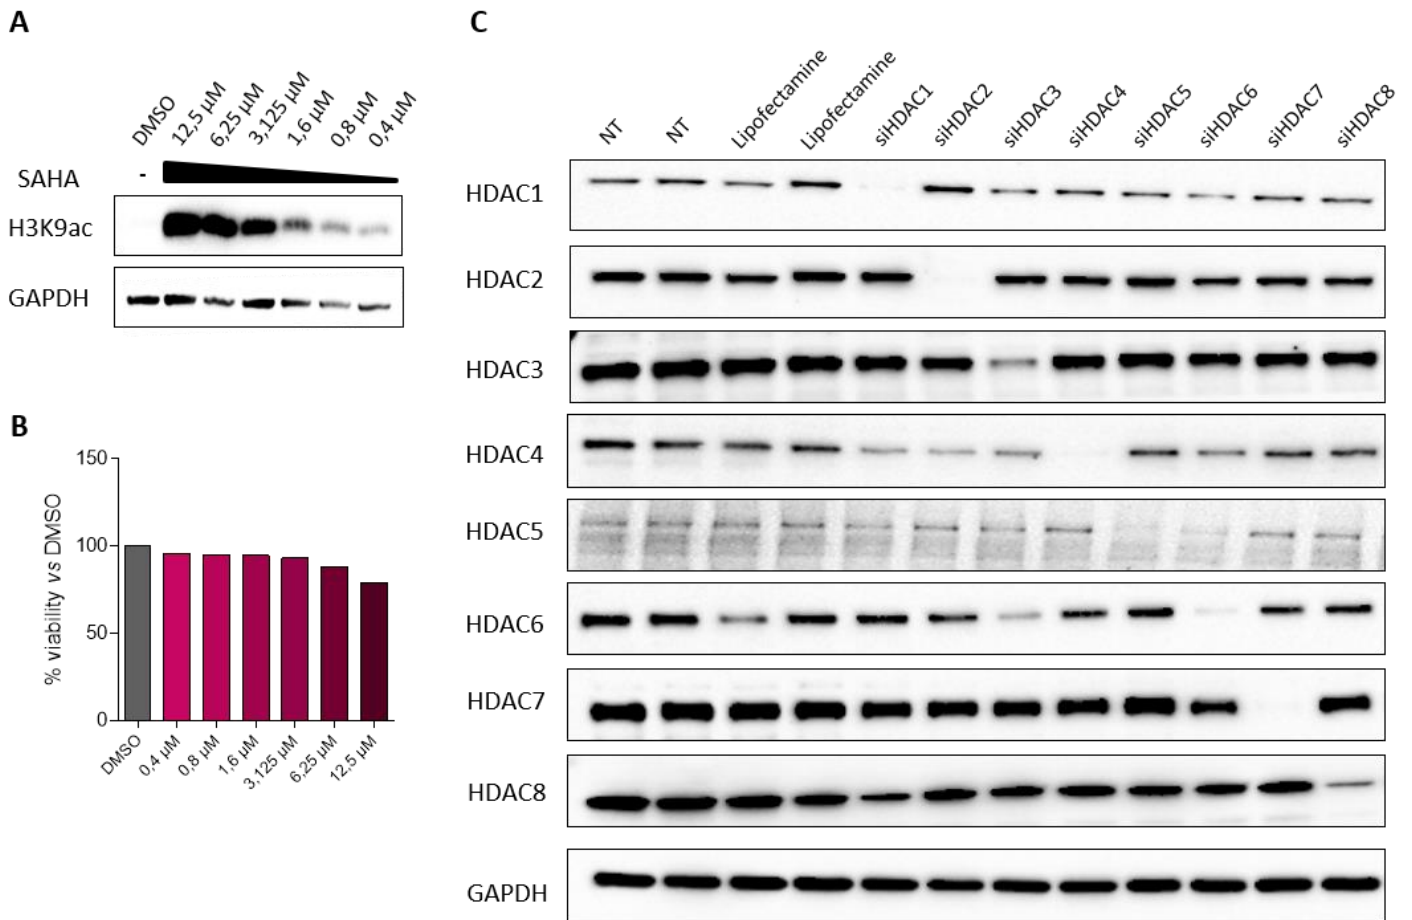

**Figure S2: Validation of the efficacy of the global HDAC inhibitor SAHA and of siRNAs.** **A:** Western blot targeting H3K9ac mark performed on Caco-2 cells treated with different concentrations of HDAC inhibitor SAHA. **B:** Cell viability was determined after 24h of SAHA treatment (n=1). **C:** Western blot performed on cells transfected with siRNA targeting the different HDAC. NT: untreated.

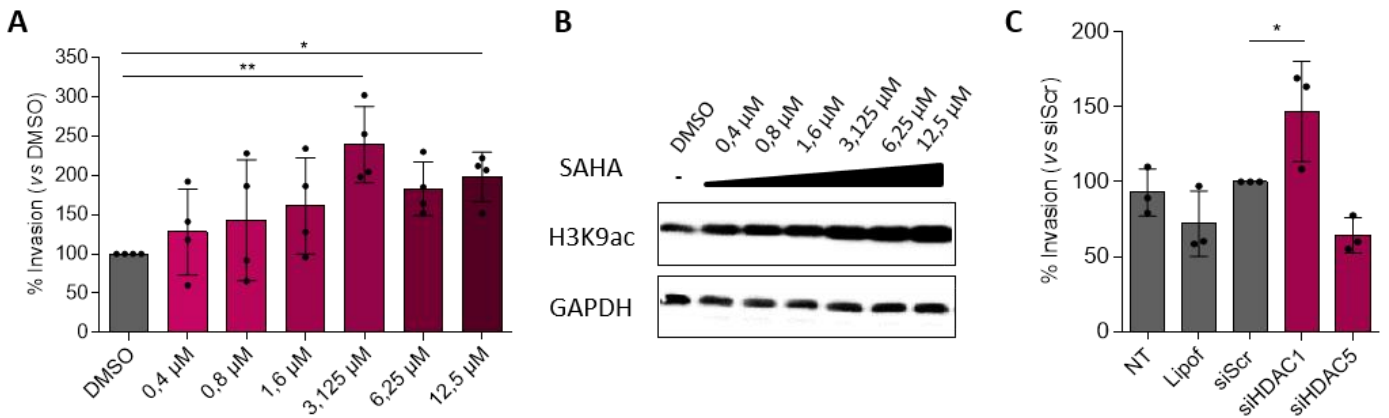

**Figure S3: Validation of the effect of the global HDAC inhibitor SAHA and siRNAs on T84 cell line** **A:** T84 cells were treated with increasing concentrations of HDAC inhibitor SAHA for 24h before infection with the AIEC strain LF82 at MOI 100. A gentamicin protection assay was performed to evaluate invasive ability of the strain in the different conditions (n=4). **B:** Western blot targeting H3K9ac mark performed on T84 cells treated with different concentrations of HDAC inhibitor SAHA. **C:** T84 cells transfected with control siRNA (siScr) or siRNA directed against HDAC1 and HDAC5 were infected with AIEC strain LF82 at MOI 100. Invasive bacteria were numbered at 4h post-infection (n=3). The results are the mean  $\pm$  SD. One-way ANOVA, \*p<0.05, \*\*p<0.01.

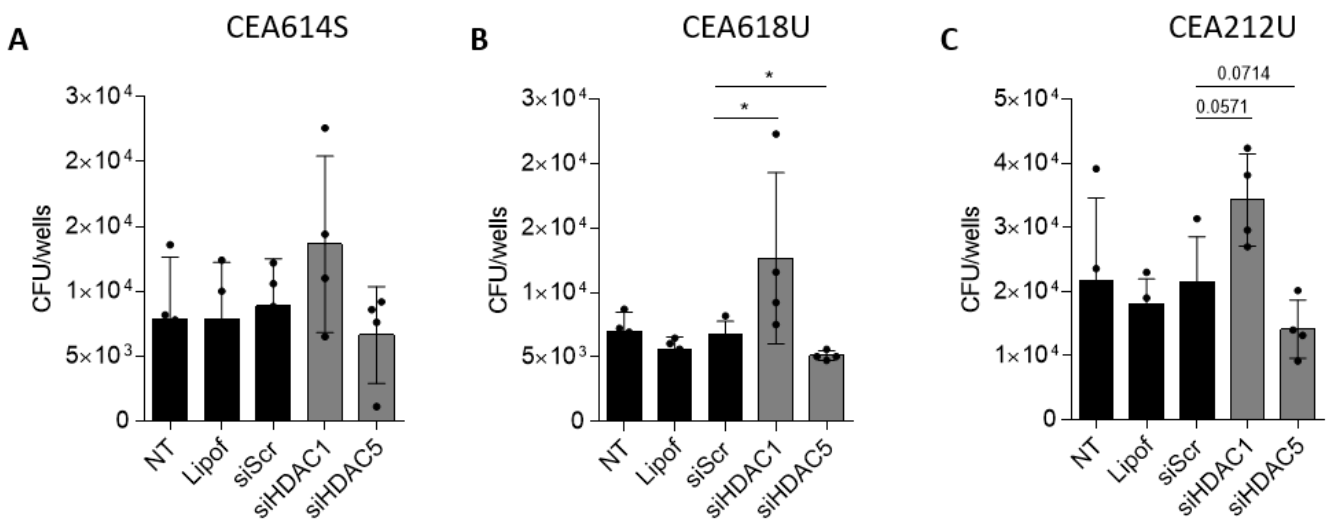

**Figure S4: HDAC1 and HDAC5 inversely regulate the invasive ability of different AIEC strains.** Caco-2 cells transfected with siRNA directed against HDAC1 and HDAC5 were infected with 3 different AIEC strains: CEA614S (A), CEA618U (B) and CEA212U (C) at MOI 100. A gentamicin protection assay was performed to measure the invasive ability of the strains in the different knocked-down conditions (n=4). The results are the mean ± SD. Mann-Whitney test, \*p<0.05. MOI: multiplicity of infection, Lipof: lipofectamine, NT: untreated, Scr: scramble.

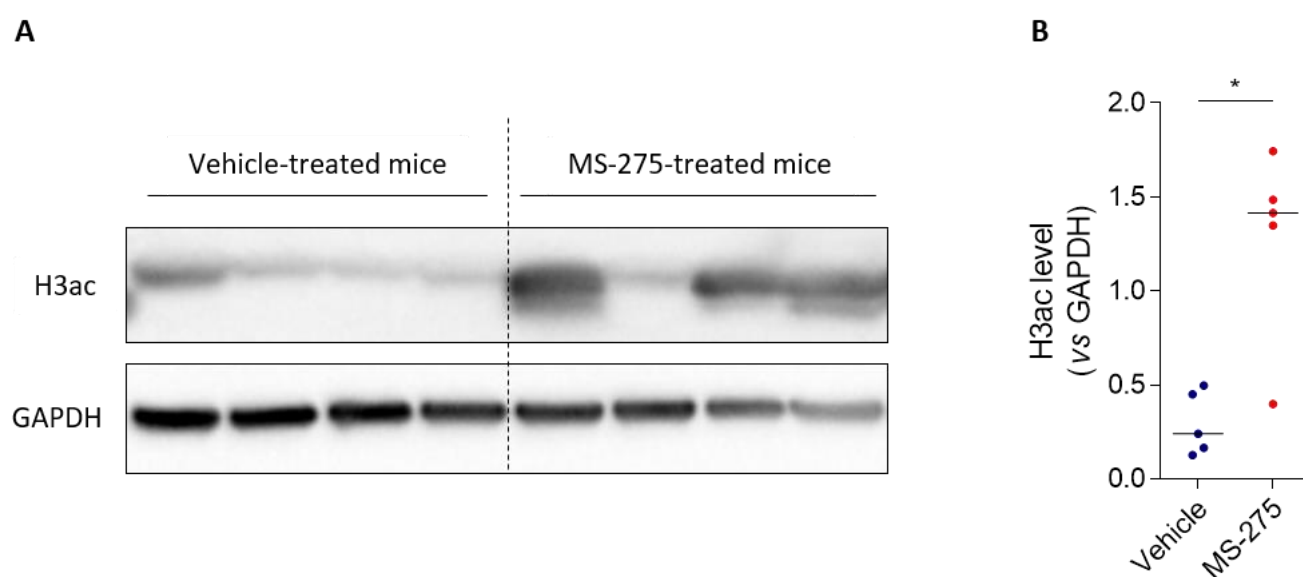

**Figure S5: Validation of the efficacy of the class I HDAC inhibitor MS-275 *in vivo*.** **A:** Western blot targeting H3ac mark performed on colonic mucosa from mice treated with 20 mg/kg/day of MS-275 for 5 days. **B:** Quantification was performed by assessing band intensities using the Image Lab software (n= 5 mice/per group). Bars represent medians. Mann-Whitney test, \*p<0.05.

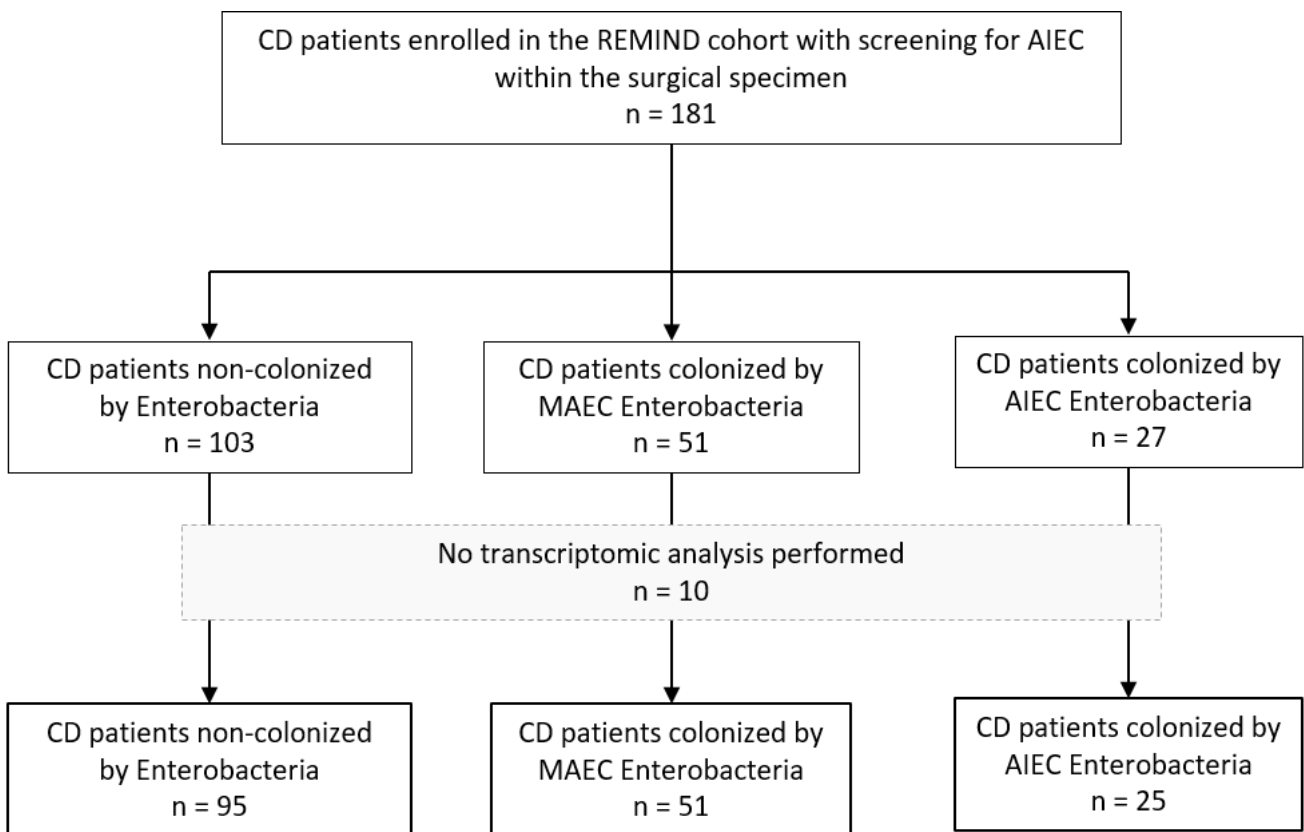

**Figure S6: Presentation of the REMIND cohort.** Patients for which Enterobacteria numbering and AIEC screening within the surgical specimen and transcriptomic analysis were performed were retained for the analysis (n=171). MAEC: Mucosa-associated *E. coli*.

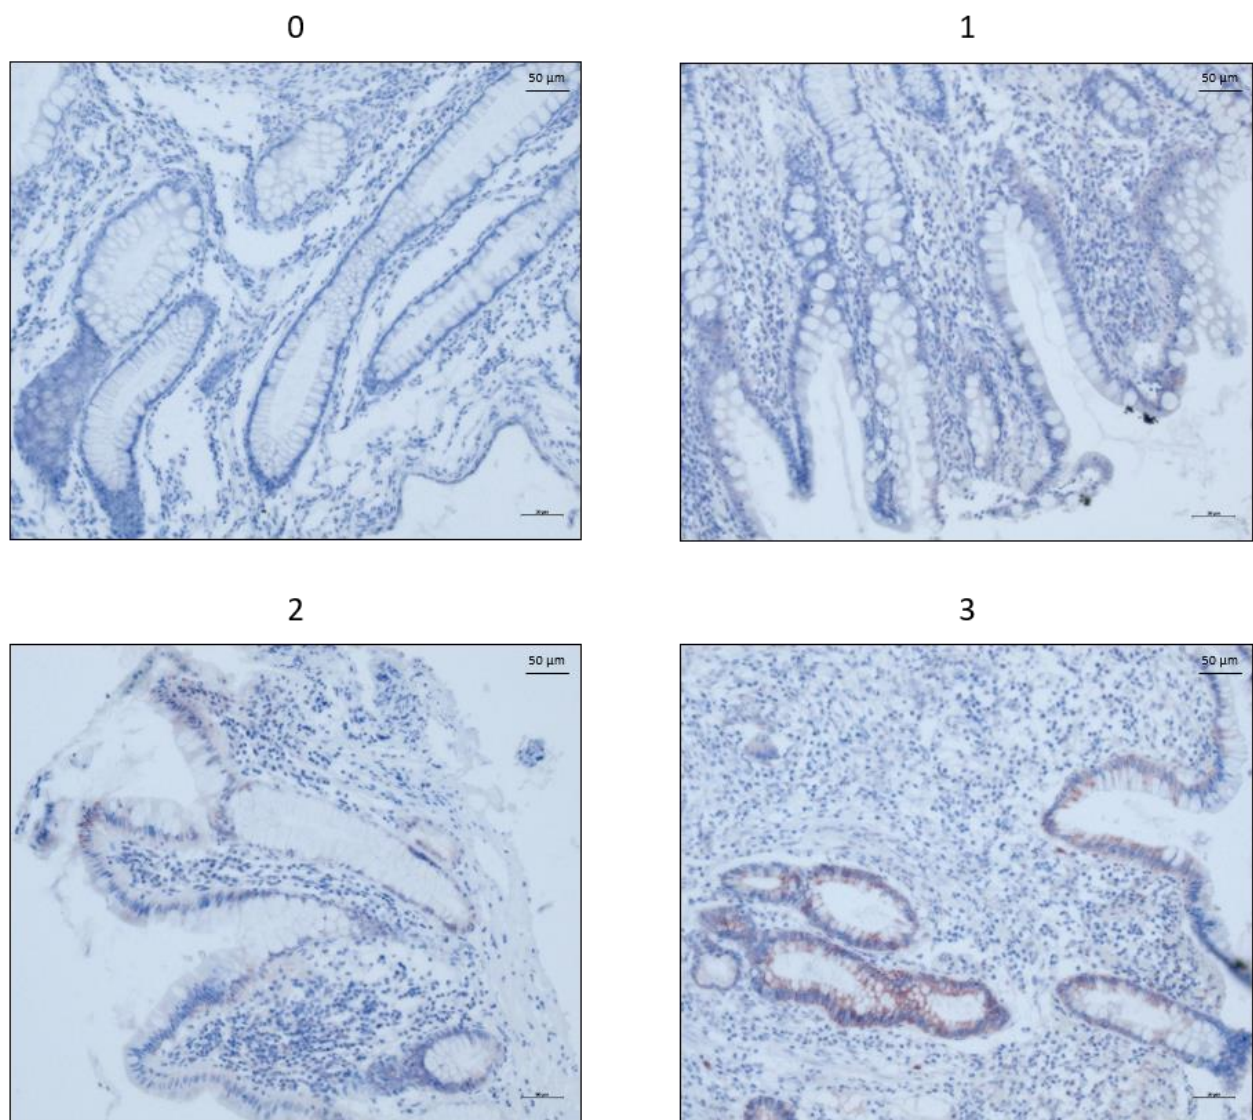

**Figure S7: Scoring examples of immunohistochemical staining of HDAC5 on mucosa samples from CD patients.** The intensity of the signal in samples was rated as following: 0- no signal, 1- low intensity signal, 2- high intensity signal, 3- very strong intensity signal.



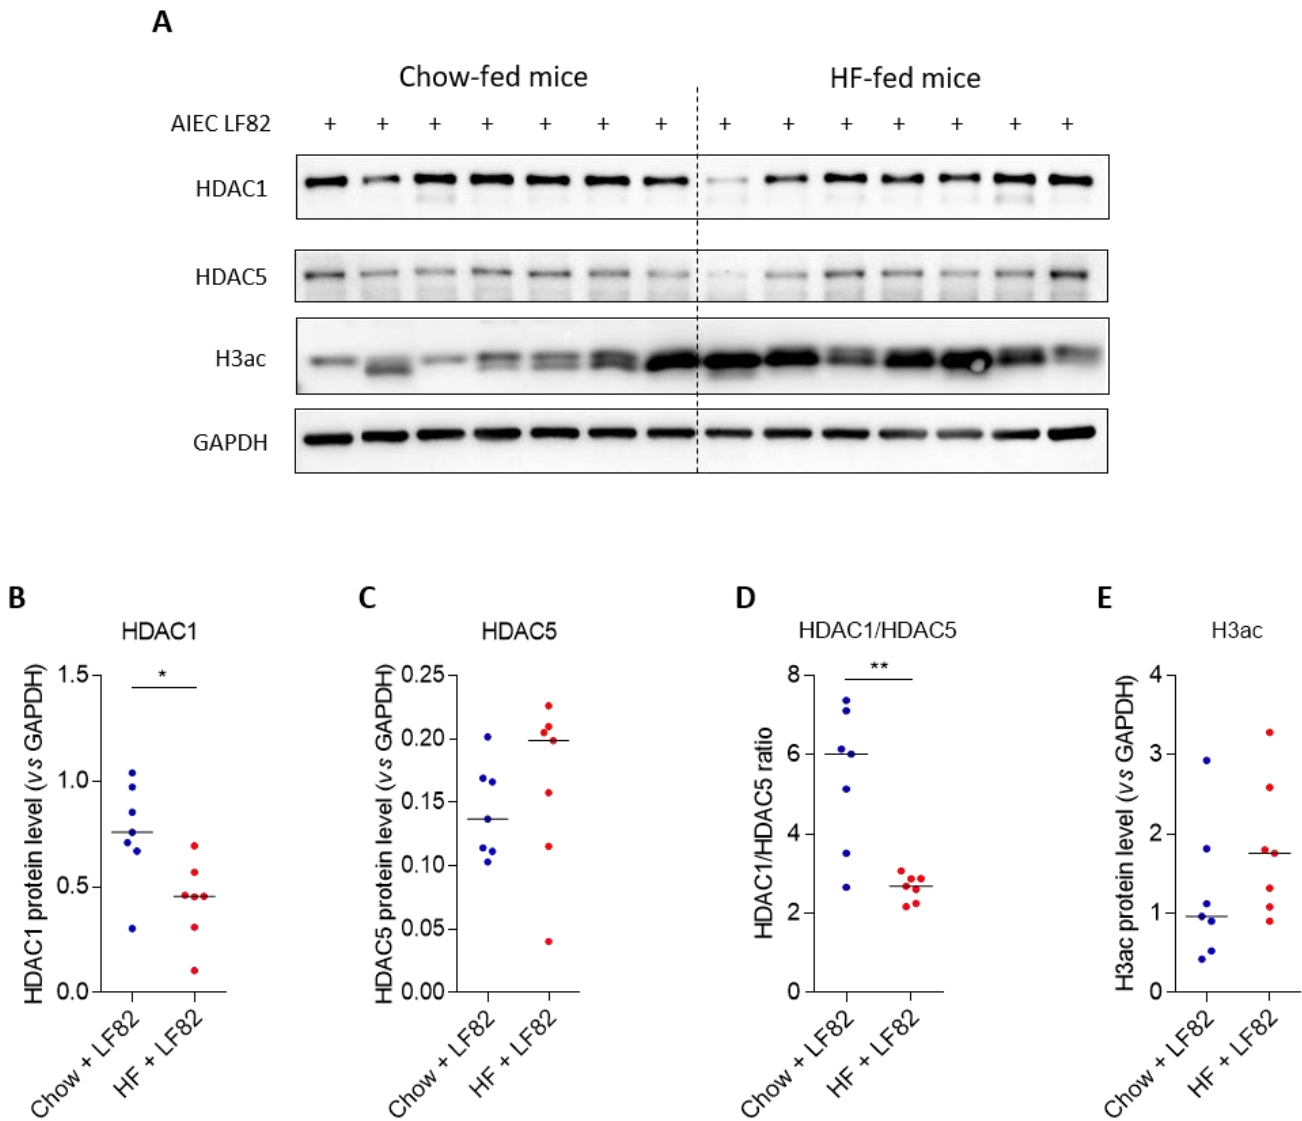

**Figure S8: HF diet is required for AIEC to induce epigenetic alterations.** **A:** HDAC1, HDAC5 and H3ac expression in colonic mucosa of Chow-fed or HF-fed mice infected with AIEC strain LF82 analyzed by western blot. **B-E:** Quantification of protein expression was performed by assessing band intensities using the Image Lab software (n= 7 mice/per group). Bars represent medians. Mann-Whitney test, \*p<0.05, \*\*p<0.01. H3ac: acetylated H3.
